# Supplementary material for: Combined Blockade of IL6 and PD-1/PD-L1 Signaling Abrogates Mutual Regulation of Their Immunosuppressive Effects in the Tumor Microenvironment
Source: Oxford University Press journal article supplement (doi:10.1158/0008-5472.can-18-0118), 2018-07-02
Supplement: 00085472can180118-sup-195414_3_supp_4847037_pvx7x1.pdf [file 00085472can180118-sup-195414_3_supp_4847037_pvx7x1.pdf]

## **Supplementary Data for**

### **Combined blockade of IL-6 and PD-1/PD-L1 signals breaks mutual regulation of their immunosuppressive effects in tumor microenvironment**

Hirotake Tsukamoto<sup>1\*</sup>, Koji Fujieda<sup>2</sup>, Azusa Miyashita<sup>3, 4</sup>, Satoshi Fukushima<sup>3</sup>, Tokunori Ikeda<sup>4</sup>, Yosuke Kubo<sup>3</sup>, Satoru Senju<sup>2</sup>, Hironobu Ihn<sup>3, 4</sup>, Yasuharu Nishimura<sup>2, 5</sup>, and Hiroyuki Oshiumi<sup>1</sup>.

<sup>1</sup>Department of Immunology, <sup>2</sup>Department of Immunogenetics, <sup>3</sup>Department of Dermatology and Plastic Surgery, Graduate School of Medical Sciences, <sup>4</sup>Department of Clinical Investigation, Faculty of Life Sciences, <sup>5</sup>Nishimura Project Laboratory, Institute of Resource Development and Analysis, Kumamoto University, Kumamoto, Japan.

#### **This file includes:**

Supplementary Figures 1, 2, 3 and 4.

Supplementary Tables 1 and 2.

## Supplementary Figure 1

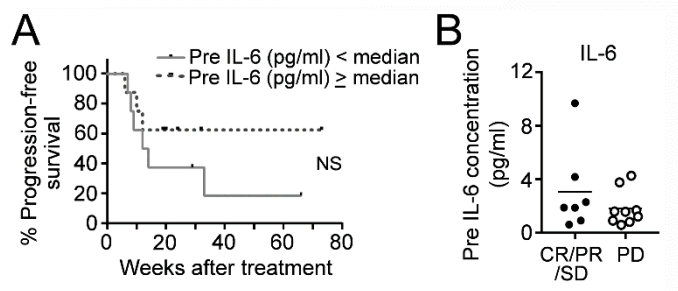

**Supplementary Figure 1.** Baseline levels of plasma IL-6 before treatment were not associated with responsiveness to Nivolumab in melanoma patients. Concentrations of IL-6 in plasma from the patients before treatment with Nivolumab were analyzed (n = 16). **A**, Based on the median value of IL-6 concentration (less (n = 8) or more (n = 8) than 1.64 pg/mL), the patients were divided into two groups. Left panel shows the ratio of progression-free survival of each group (higher group; median PFS 11 weeks, 95%CI 6–14 weeks, lower group; median PFS NA, 95%CI 8–NA weeks). NS, not significant. **B**, Patients were divided based on their clinical responses (CR, PR, SD versus PD), and the concentrations of IL-6 before treatment were plotted (right panel).

## Supplementary Figure 2

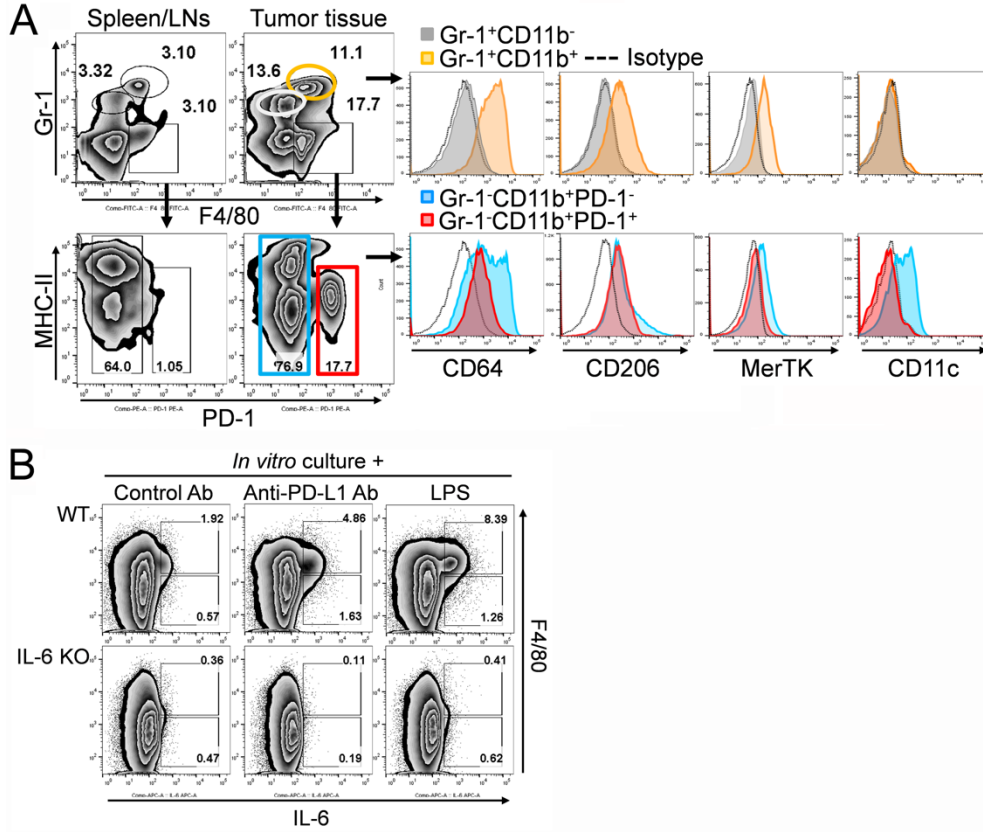

**Supplementary Figure 2.** Characterization of PD-1-expressing macrophages from tumor tissues. **A**, Tumor-infiltrating macrophages were segregated with SSC/FSC parameters, and then were discriminated from Gr-1<sup>+</sup>CD11b<sup>+</sup> MDSCs by their Gr-1 and F4/80 expression. Gr-1<sup>+</sup>F4/80<sup>+</sup> macrophages expressed CD11b, and were further divided by their PD-1 and MHC-II expression (lower left panels). Histograms show the expression levels of indicated molecules in each myeloid fraction. **B**, Cell suspension from tumor tissues of MO4-bearing WT or IL-6-deficient (KO) mice were cultured *in vitro* in the presence or absence of anti-PD-L1 Ab for 18 hours, or were stimulated with LPS for 10 hours. IL-6-producing cells were determined by flow cytometric analysis with intracellular IL-6 staining. The representative dot plots of CD45<sup>+</sup>F4/80<sup>+</sup> IL-6 producing cells are shown. \*  $P < 0.05$ , \*\*  $P < 0.01$ , \*\*\*  $P < 0.001$ . The data are representative of 2 independent experiments, and the values represent the mean with  $n = 3-5$  per group.

## Supplementary Figure 3

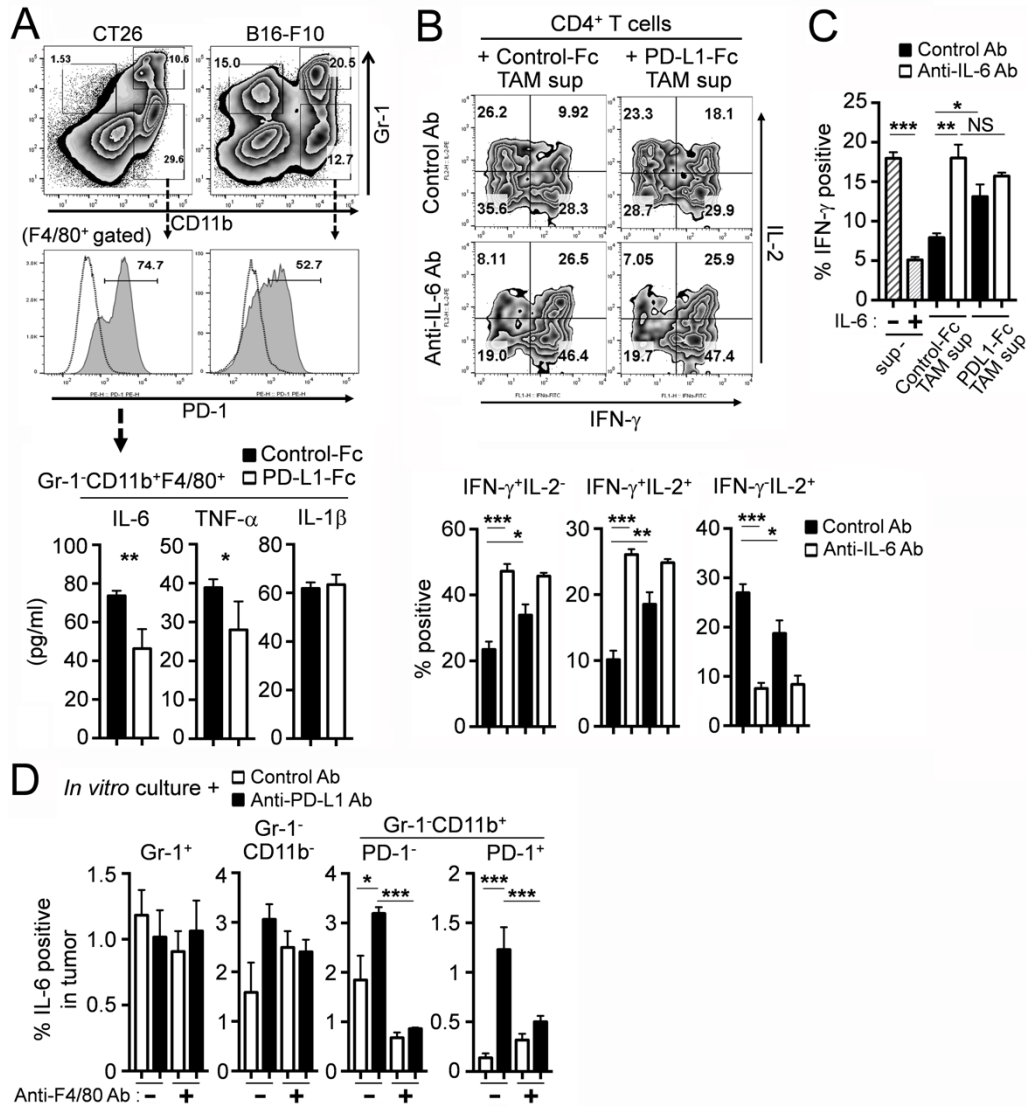

**Supplementary Figure 3.** Characterization of IL-6-producing TAMs. **A**, CD11b<sup>+</sup>Gr-1<sup>+</sup>F4/80<sup>+</sup> TAMs from CT26- or B16-F10-bearing mice were analyzed for PD-1 expression (upper panels). TAMs from CT26-bearing mice were stimulated with control-Fc or PD-L1-Fc *in vitro*. Concentration of the indicated cytokines in their culture supernatants were assessed. **B** and **C**, TAMs were isolated from B16-F10 (**B**) or CT26 (**C**)-bearing mice, and were stimulated with control-Fc or PD-L1-Fc *in vitro*. Supernatant from the culture of TAMs or B16-F10, or recombinant IL-6 was then added into T-cell culture, in which C57BL/6 (**B**) or Balb/c (**C**) CD4<sup>+</sup> T cells were stimulated with anti-CD3/CD28 Abs in the presence of IL-12 (under Th1-skewed condition). Seven (**B**) or 5 (**C**) days later, IFN- $\gamma$ - and IL-2-producing T cells were analyzed. Representative dot plots (upper panels of **B**) and their frequencies in each condition (lower panels of **B**, and **C**) are shown. **D**, Tumor tissues from MO4-bearing mice that were injected with control or anti-F4/80 Ab *in vivo*, were treated with control or anti-PD-L1 Ab for 18 hours *in vitro*, and then were stained with indicated cell surface markers and intracellular IL-6 as in Supplementary Fig. S2B. The frequencies of IL-6<sup>+</sup> cells of indicated populations in the culture (tumor) are shown. \*  $P < 0.05$ , \*\*  $P < 0.01$ , \*\*\*  $P < 0.001$ . The data are representative of 2

independent experiments, and the values represent the mean with  $n = 3\text{--}5$  per group.

## Supplementary Figure 4

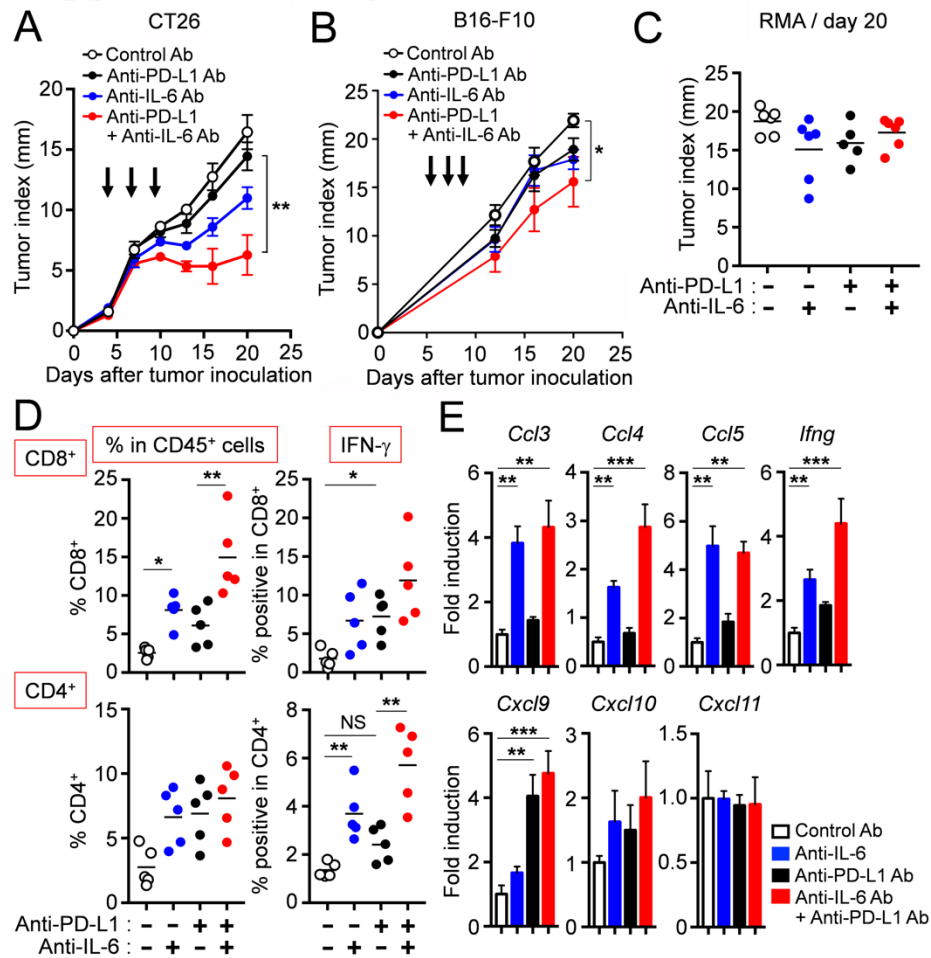

**Supplementary Figure 4.** Therapeutic effects of combined treatment with anti-IL-6 and anti-PD-L1 Abs in tumor-bearing mice. **A–C**, CT26 (A, D, and E)-, B16-F10 (B), or RMA (C)-bearing mice were treated with anti-IL-6 and/or anti-PD-L1 Ab. Arrows in A and B indicates the time when the Abs were injected in mice. Tumor outgrowth was monitored over time (A and B). Tumor sizes of RMA at day 20 are shown (C). **D** and **E**, Three days after second Abs injection, tumor tissues were harvested from CT26-bearing mice, and analyzed for the frequencies of indicated population (D) and the expression of indicated mRNA (E). The data are representative of 2 or 3 independent experiments ( $n = 5–10$ ). \*  $P < 0.05$ , \*\*  $P < 0.01$ , \*\*\*  $P < 0.001$ . NS, not significant.

## Supplementary Table 1

**Demographics and disease characteristics of melanoma patients treated with Nivolumab.**

| No. | Age / Gender        | Prior systemic therapies                            | The day when the treatment started | Pre IL-6 (ng/ml), Date <sup>b</sup> | On IL-6 (ng/ml), Date <sup>b</sup> | On /Pre IL-6 | Clinical response |
|-----|---------------------|-----------------------------------------------------|------------------------------------|-------------------------------------|------------------------------------|--------------|-------------------|
| 1   | 75 / F <sup>a</sup> | BRAF inhibitors/<br>MEK inhibitor/<br>IDO inhibitor | 2017/03/09                         | 1.68<br>(2017/03/09)                | 6.36<br>(2017/05/23)               | 3.78         | PD <sup>a</sup>   |
| 2   | 53 / F              | -                                                   | 2016/03/17                         | 1.60<br>(2016/03/17)                | 9.46<br>(2016/06/16)               | 5.92         | PD                |
| 3   | 62 / M              | Ipilimumab/<br>carbon-ion<br>radiotherapy           | 2016/04/04                         | 4.17<br>(2016/04/04)                | 1.97<br>(2016/07/14)               | 0.47         | SD                |
| 4   | 81 / M              | Interferon- $\beta$                                 | 2016/05/19                         | 1.22<br>(2016/05/19)                | 5.95<br>(2016/08/18)               | 4.88         | PD                |
| 5   | 74 / M              | -                                                   | 2017/02/16                         | 0.81<br>(2017/01/30)                | 0.97<br>(2017/05/08)               | 1.19         | PD                |
| 6   | 64 / M              | carbon-ion<br>radiotherapy                          | 2016/08/18                         | 3.76<br>(2016/08/18)                | 17.8<br>(2016/11/08)               | 4.75         | PD                |
| 7   | 53 / F              | carbon-ion<br>radiotherapy                          | 2016/08/22                         | 0.60<br>(2016/08/22)                | 1.10<br>(2016/11/28)               | 1.84         | PD                |
| 8   | 66 / M              | -                                                   | 2016/09/01                         | 0.62<br>(2016/09/01)                | 0.54<br>(2016/10/14)               | 1.87         | SD                |
| 9   | 76 / M              | -                                                   | 2016/11/10                         | 0.92<br>(2016/11/10)                | 8.00<br>(2017/01/26)               | 8.72         | PD                |
| 10  | 31 / M              | Ipilimumab                                          | 2016/12/26                         | 4.27<br>(2016/12/26)                | 10.8<br>(2017/04/12)               | 2.53         | PD                |
| 11  | 79 / F              | carbon-ion<br>radiotherapy                          | 2017/04/06                         | 1.89<br>(2017/04/06)                | 1.46<br>(2017/07/10)               | 0.77         | CR                |
| 12  | 63 / M              | -                                                   | 2016/09/28                         | 1.58<br>(2016/09/28)                | 6.54<br>(2016/12/27)               | 4.15         | PD                |
| 13  | 70 / M              | Ipilimumab/<br>carbon-ion<br>radiotherapy           | 2017/01/12                         | 1.88<br>(2017/01/05)                | 1.43<br>(2017/03/13)               | 0.76         | PR                |
| 14  | 71 / M              | BRAF inhibitors/<br>MEK inhibitor                   | 2017/02/02                         | 0.91<br>(2017/02/02)                | 0.27<br>(2017/04/27)               | 0.30         | PR                |
| 15  | 77 / M              | -                                                   | 2017/03/09                         | 2.29<br>(2017/03/09)                | 0.25<br>(2017/06/08)               | 0.11         | PR                |
| 16  | 58 / M              | carbon-ion<br>radiotherapy                          | 2017/04/13                         | 9.68<br>(2017/04/13)                | 2.50<br>(2017/07/28)               | 0.26         | SD                |

<sup>a</sup>Abbreviations: CR; complete response, PR; partial response, SD; stable disease, PD; progressive disease, M; male, F; female

<sup>b</sup>Blood sampling was performed before and during Nivolumab treatment.

## Supplementary Table 2

Demographics and disease characteristics of melanoma patients receiving surgery.

| No. | Age / Gender        | The day of surgery | Pre IL-6 (ng/ml), Date <sup>b</sup> | Post IL-6 (ng/ml), Date <sup>b</sup> | Post /Pre IL-6 |
|-----|---------------------|--------------------|-------------------------------------|--------------------------------------|----------------|
| 1   | 79 / F <sup>a</sup> | 2016/01/21         | 8.64<br>(2016/01/21)                | 2.99<br>(2016/05/02)                 | 0.35           |
| 2   | 65 / F              | 2016/01/27         | 1.77<br>(2016/01/27)                | 1.08<br>(2016/05/02)                 | 0.61           |
| 3   | 66 / M              | 2016/02/18         | 2.28<br>(2016/02/18)                | 0.62<br>(2016/05/20)                 | 0.27           |
| 4   | 68 / M              | 2016/02/24         | 1.14<br>(2016/02/24)                | 1.30<br>(2016/06/02)                 | 1.15           |
| 5   | 71 / M              | 2016/04/20         | 0.60<br>(2016/04/20)                | 0.78<br>(2017/07/11)                 | 1.29           |
| 6   | 91 / M              | 2016/05/25         | 1.71<br>(2016/05/25)                | 3.66<br>(2016/08/31)                 | 2.15           |
| 7   | 85 / F              | 2016/06/22         | 1.22<br>(2016/06/22)                | 0.58<br>(2016/10/06)                 | 0.48           |
| 8   | 54 / F              | 2016/06/22         | 0.64<br>(2016/06/22)                | 0.18<br>(2016/10/13)                 | 0.29           |
| 9   | 77 / F              | 2016/07/14         | 0.30<br>(2016/07/14)                | 0.82<br>(2016/11/09)                 | 2.78           |
| 10  | 75 / M              | 2016/07/14         | 0.85<br>(2016/07/14)                | 0.55<br>(2017/10/13)                 | 0.64           |
| 11  | 93 / F              | 2016/07/22         | 2.17<br>(2016/07/22)                | 2.64<br>(2016/12/07)                 | 1.22           |
| 12  | 86 / F              | 2016/08/03         | 0.78<br>(2016/08/03)                | 0.84<br>(2016/11/30)                 | 1.09           |
| 13  | 56 / F              | 2017/08/17         | 0.30<br>(2017/08/17)                | 0.70<br>(2016/12/05)                 | 2.35           |
| 14  | 72 / M              | 2016/06/29         | 0.35<br>(2016/06/29)                | 0.35<br>(2016/09/15)                 | 0.99           |
| 15  | 68 / F              | 2017/01/25         | 2.32<br>(2017/01/25)                | 0.03<br>(2017/05/08)                 | 0.01           |
| 16  | 54 / F              | 2016/10/12         | 2.94<br>(2016/10/12)                | 0.22<br>(2017/03/06)                 | 0.07           |
| 17  | 86 / M              | 2016/10/26         | 1.19<br>(2016/10/26)                | 11.3<br>(2017/02/20)                 | 9.51           |
| 18  | 72 / M              | 2016/11/24         | 1.79<br>(2016/11/24)                | 0.65<br>(2017/02/20)                 | 0.37           |

<sup>a</sup>Abbreviations: M; male, F; female

<sup>b</sup>Blood sampling was performed before and after surgery.
